# Supplementary material for: Glycyrrhetinic acid-decorated and reduction-sensitive micelles to enhance the bioavailability and anti-hepatocellular carcinoma efficacy of tanshinone IIA
Source: Royal Society of Chemistry journal article supplement (doi:10.1039/c5bm00224a), 2015-10-20
Supplement: c5bm00224a1.pdf [file c5bm00224a1.pdf]

## Supporting information

### **Glycyrrhetic Acid-decorated and Reduction-sensitive Micelles to Enhance Bioavailability and Anti-hepatocellular Carcinoma Efficacy of Tanshinone IIA**

Fengqian Chen<sup>1,†</sup>, Jinming Zhang<sup>1,†</sup>, Yao He<sup>2</sup>, Xiefan Fang<sup>3</sup>, Yitao Wang<sup>1,\*</sup>, Meiwan Chen<sup>1,\*</sup>

<sup>1</sup> *State Key Laboratory of Quality Research in Chinese Medicine, Institute of Chinese Medical Sciences, University of Macau, Macao 999078, China*

<sup>2</sup> *Pharmacy College, State Key Laboratory Breeding Base of Systematic Research, Development and Utilization of Chinese Medicine Resources, Chengdu University of Traditional Chinese Medicine, Chengdu, 610075, China.*

<sup>3</sup> *Department of Pediatrics, College of Medicine, University of Florida, Gainesville, FL 32610, USA*

† These authors contributed equally to the work

#### **\*Correspondence Authors:**

Prof. Yitao Wang, Institute of Chinese Medical Sciences, University of Macau, Av. Padre Tomas Pereira S.J., Taipa, Macau, China.

Dr. Meiwan Chen, Institute of Chinese Medical Sciences, University of Macau, Av. Padre Tomas Pereira S.J., Taipa, Macau, China.

E-mail address: ytwang@umac.mo, mwchen@umac.mo

## Result

### 1. Molecular weight of polymer

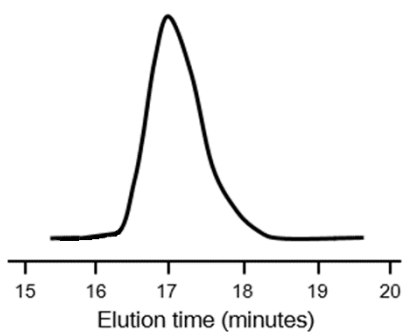

Fig S1. GPC trace of GA-PEG-SS-PLGA polymer with tetrahydrofuran as elution phase

### 2. Stability of micelles

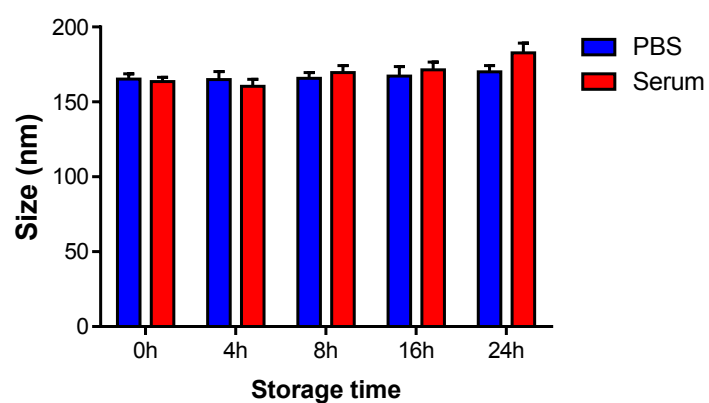

Fig S2. Storage stability of GA-PEG-SS-PLGA micelles in both PBS and serum

### 3. Stability of TAN IIA in presence of DTT

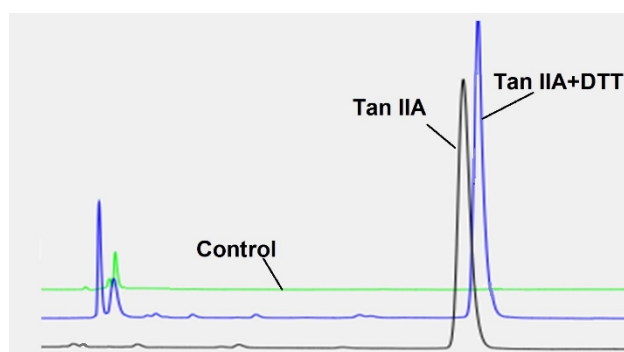

Fig S3. HPLC spectra of TAN IIA with or without the presence of 10 mM DTT
